# Supplementary material for: Ultrafast, cytocompatible mineralization of calcium phosphate in the formation of stratified nanoshells of artificial spores
Source: Royal Society of Chemistry journal article supplement (doi:10.1039/d5cc00522a), 2025-01-01
Supplement: d5cc00522a1.pdf [file d5cc00522a1.pdf]

## Electronic Supplementary Information

### Ultrafast, Cytocompatible Mineralization of Calcium Phosphate in Formation of Stratified Nanoshells of Artificial Spores

Duc Tai Nguyen,<sup>a</sup> Sang Yeong Han,<sup>a</sup> Hyunwoo Choi,<sup>a</sup> Nayoung Kim,<sup>a</sup> Gulaim A. Seisenbaeva,<sup>b</sup> Vadim G. Kessler,<sup>b</sup> and Insung S. Choi<sup>\*a</sup>

<sup>a</sup> Department of Chemistry, KAIST, Daejeon 34141, Korea

<sup>b</sup> Department of Molecular Sciences, SLU, Uppsala 75007, Sweden

#### Table of Contents

- **Experimental.**
- **Figure S1.** TEM, DLS, and SAED analyses of ***a*-preCaP**.
- **Figure S2.** Optical images of the ***a*-preCaP** solution before and after TA addition and XRD analysis of PS@CaP.
- **Figure S3.** Characterization of BSA immobilization onto ***a*-preCaP**.
- **Figure S4.** FE-SEM images of TA-Ca<sup>2+</sup>-primed PS and *S. cerevisiae*, and zeta (ζ)-potential analyses of *S. cerevisiae* in the shell formation.
- **Figure S5.** TEM and CLSM images of *S. cerevisiae*@CaP formed by the conventional method.
- **Figure S6.** CLSM images of *S. cerevisiae*@CaP from 3 independent experiments.
- **Figure S7.** FE-SEM images of *L. acidophilus* and *L. acidophilus*@CaP.
- **Figure S8.** CLSM images of PS@CaP<sub>[DNA]</sub>.
- **Figure S9.** CLSM images and line profiles of triple-layered CaP shells on *S. cerevisiae*.
- **Figure S10.** ABTS assay of GOx/HRP-embedded *S. cerevisiae*@CaP.
- **Figure S11.** Long-term viability and reaction rate of GOx/HRP-embedded *S. cerevisiae*@CaP.

## Experimental

**Materials.** Calcium chloride dihydrate ( $\text{CaCl}_2 \cdot 2\text{H}_2\text{O}$ , 99%, Sigma), potassium phosphate tribasic ( $\text{K}_3\text{PO}_4$ , 98%, Junsei), tannic acid (TA, Sigma-Aldrich), Alexa Fluor 488-conjugated albumin from bovine serum (BSA-Alexa 488, Invitrogen), Alexa Fluor 647-conjugated albumin from bovine serum (BSA-Alexa 647, Invitrogen), deoxyribonucleic acid sodium salts from salmon testes (DNA), Hoechst 33342 (trihydrochloride, trihydrate, 10 mg/mL, solution in water, Invitrogen<sup>TM</sup>), lysozyme from hen egg white (>23000 U/mg, Roche), lyticase (from *Arthrobacter luteus*, Sigma-Aldrich), D-(+)-glucose ( $\geq 99.5\%$ , Sigma-Aldrich), glucose oxidase (GOx, from *Aspergillus niger*, Sigma-Aldrich), horseradish peroxidase (HRP, from *Amoracia rusticana*, Sigma-Aldrich), 2,2'-azino-bis(3-ethylbenzothiazoline-6-sulfonic acid) diammonium salt (ABTS,  $\geq 98.0\%$ , Sigma-Aldrich), propidium iodide (PI, Sigma-Aldrich), fluorescein diacetate (FDA, Sigma-Aldrich), calcein (mixture of isomers, TCI), glycerol (99%, Sigma-Aldrich), polystyrene microparticle (PS, diameter: 3.97  $\mu\text{m}$ , Microparticles GmbH), *Lactobacillus acidophilus* (*L. acidophilus* ATCC 4356 from the American Type Culture Collection (ATCC)), *Lactobacilli* MRS broth (BD), *Lactobacilli* MRS agar (BD), *Saccharomyces cerevisiae* (*S. cerevisiae* ATCC 18824 from the Korean Collection for Type Cultures (KCTC)), yeast-extract-peptone-dextrose (YPD) broth (Duchefa Biochemistry), YPD agar (Duchefa Biochemistry), phosphate-buffered saline (PBS, pH 7.4, Welgene), and ethylenediaminetetraacetic acid (EDTA,  $\geq 98\%$ , Sigma-Aldrich) were used as received. Deionized (DI) water (18.3  $\text{M}\Omega \cdot \text{cm}$ ) from Milli-Q Direct 8 (Millipore) was used.

**Preparation of *a*-preCaP solutions.** To 600  $\mu\text{L}$  of DI water were sequentially added 200  $\mu\text{L}$  of an aqueous  $\text{CaCl}_2$  solution (24 mM) and 200  $\mu\text{L}$  of an aqueous  $\text{K}_3\text{PO}_4$  solution (16 mM). For biomolecule incorporation into CaP shells, the appropriate volume of an aqueous biomolecule stock solution was added to the  $\text{CaCl}_2$  solution (800  $\mu\text{L}$ ) before the addition of the  $\text{K}_3\text{PO}_4$  solution, in the preparation of an *a*-preCaP solution. The concentrations and volumes of the biomolecule stock solutions used in the immobilization experiments are provided in the table below:

| Biomolecule   | Concentration (mg/mL) | Volume ( $\mu\text{L}$ )             |
|---------------|-----------------------|--------------------------------------|
| BSA-Alexa 647 | 5                     | 1                                    |
| BSA-Alexa 488 | 1                     | 0.5                                  |
| DNA           | 1                     | 10                                   |
| GOx           | 1                     | 5                                    |
|               |                       | 2.5 (for the mixture of GOx and HRP) |
| HRP           | 1                     | 5                                    |
|               |                       | 2.5 (for the mixture of GOx and HRP) |

**Formation of CaP Shells.** (a) *TA-Ca<sup>2+</sup> priming*: PS particles were used as received. A single colony of *L. acidophilus*, picked from an MRS agar plate, was cultured in the MRS broth medium at 33 °C for 24 h. A single colony of *S. cerevisiae* was picked from a YPD agar plate and cultured in a YPD broth with shaking at 30 °C for 30 h. To a pellet of PS particles or cells, 1000  $\mu\text{L}$  of a TA stock solution (6 mM) and 500  $\mu\text{L}$  of the  $\text{CaCl}_2$  stock solution (24 mM) were

added sequentially. After 60 min of incubation, the TA-Ca<sup>2+</sup>-primed PS particles or cells were purified by centrifugating at 3000 g and washing with DI water once. (b) *Formation of CaP nanoshells*: The TA-Ca<sup>2+</sup>-primed PS particles or cells were mixed with 1000  $\mu$ L of the **a-preCaP** solution, gently shaken, and immediately purified by centrifugating at 3000 g and washing with DI water twice. The second layer was formed by repeating the processes of TA-Ca<sup>2+</sup> priming and CaP shell formation, with 30 min of incubation in the TA-Ca<sup>2+</sup> mixture for the second layer. (c) *Formation of *S.cerevisiae*@CaP by the conventional method*: To 600  $\mu$ L of TA-Ca<sup>2+</sup>-primed *S. cerevisiae*, 200  $\mu$ L of the CaCl<sub>2</sub> stock solution (24 mM) was added, followed by the dropwise addition of 200  $\mu$ L of the K<sub>3</sub>PO<sub>4</sub> stock solution (16 mM) at the rate of 20  $\mu$ L/min with gentle shaking. The resulting cells were collected by centrifugating at 3000 g and washing with DI water. (d) *Immobilization efficiency of BSA-Alexa 647*: After forming CaP nanoshells in the **a-preCaP** solution containing 5  $\mu$ g/mL BSA-Alexa 647 (1001  $\mu$ L), the PS@CaP or *S.cerevisiae*@CaP pellet was collected by centrifugating at 3000 g and washing with DI water twice, and resuspended in 1001  $\mu$ L of an aqueous EDTA solution (100 mM, pH 8) for shell degradation. After 1 min of incubation, the supernatant was collected by centrifugating at 3000 g, and the UV-Vis absorbance was measured at 647 nm. The immobilization efficiency was calculated with the UV-Vis absorbance of the **a-preCaP** solution that contained EDTA (100 mM, pH 8) and BSA-Alexa 647 (5  $\mu$ g/mL) as a reference.

**Viability Assay.** The 5  $\mu$ L of an FDA stock solution (10 mg/mL in acetone) and 2  $\mu$ L of a PI stock solution (1 mg/mL in DI water) were mixed with 1 mL of a *S. cerevisiae* or *S.cerevisiae*@CaP suspension in DI water for 15 min at 30 °C, while shaking. The viability was assessed, after washing with DI water, by confocal laser-scanning microscopy (CLSM). For the viability assay of *L. acidophilus* and *L.acidophilus*@CaP, 1  $\mu$ L of an SYTO 9 stock solution (3.34 mM in DMSO) and 2  $\mu$ L of the PI stock solution (20 mM in DMSO) were used.

**Cytoprotection and Enzymatic Reactions.** (a) *Protection against lysozyme*: To 100  $\mu$ L of *L.acidophilus*@CaP or naïve *L. acidophilus* (OD<sub>600</sub> = 1, in DI water) was added 900  $\mu$ L of a lysozyme solution (1 mg/mL in PBS buffer, pH 7.4). The mixture was incubated at 37 °C in an incubator, and the OD<sub>600</sub> values were measured with 100  $\mu$ L of aliquots taken at the predetermined time points. (b) *Protection against lyticase*: A lyticase stock solution was prepared by dissolving lyticase (2 mg) in a mixture of 500  $\mu$ L of glycerol and 500  $\mu$ L of PBS (50 mM, pH 7.4). To 500  $\mu$ L of *S.cerevisiae*@CaP or naïve *L. acidophilus* (OD<sub>600</sub> = 1, in DI water) were sequentially added 500  $\mu$ L of PBS and 20  $\mu$ L of the lyticase stock solution. The mixture was incubated at 37 °C in an incubator, and the OD<sub>600</sub> values were measured with 100  $\mu$ L of aliquots taken at the predetermined time points. (c) *Enzymatic reactions*: All the samples (*S.cerevisiae*@CaP<sub>[HRP]/[GOx]</sub>, *S.cerevisiae*@CaP<sub>[GOx]/[HRP]</sub>, *S.cerevisiae*@CaP<sub>[GOx\_HRP]/[GOx\_HRP]</sub>, and naïve *S. cerevisiae*) were adjusted to an OD<sub>600</sub> of 1 in DI water. To 200  $\mu$ L of each sample were sequentially added 200  $\mu$ L of DI water, 200  $\mu$ L of ABTS (4 mM, in DI water), and 200  $\mu$ L of glucose (100 mM, in DI water). The UV-Vis absorbance of the reaction mixture was measured at 414 nm every 2 min over a 4-hour period, using 100  $\mu$ L aliquots in a 96-well plate, with a SpectraMax iD5 microplate reader (Molecular Devices) in kinetic mode. The plate was shaken for 5 sec, before each measurement, with double-orbital shaking mode at medium intensity. Five aliquots were used from each sample. The reaction rate was estimated based on the initial slope of the time-lapse absorbance curves.

**Characterizations.** Field-emission scanning electron microscopy (FE-SEM) imaging was performed with an FEI Inspect F50 microscope (FEI) with an accelerating voltage of 5 kV, after sputter-coating with platinum. Transmission electron microscopy (TEM) imaging, selected area electron diffraction (SAED), and energy-dispersive X-ray (EDX) spectroscopy elemental analysis were conducted with a Talos F200X (FEI) with a carbon-support-film copper mesh. The  $\zeta$  potential and dynamic light scattering (DLS) size were measured with a Zetasizer Nano ZS (Malvern). X-ray diffraction (XRD) analysis was conducted with a SmartLab (RIGAKU). CLSM imaging was performed with an LSM 700 (Carl Zeiss), and UV-Vis absorbance was measured with a SpectraMax iD5 microplate reader (Molecular Devices) in a 96-well plate.

**Statistical Analysis.** Multiple independent samples ( $n = 3$ ) were prepared, with one measurement performed for each sample, except for the ABTS enzymatic reaction experiments, where five measurements were taken per sample, and the average was considered as one data point. Data are presented as mean  $\pm$  SD. Statistical significance was determined using an unpaired, two-sided Student's  $t$ -test ( $n = 3$ ). Data analysis and graph generation were performed using IBM SPSS Statistics 26 and Origin 2019.

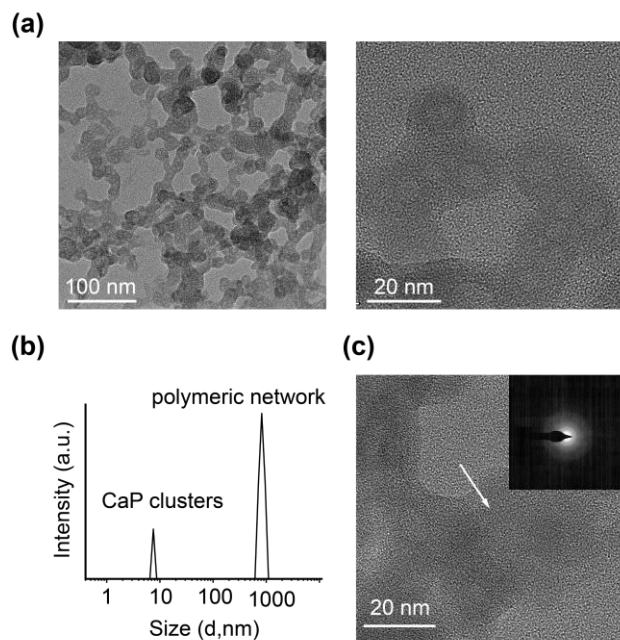

**Figure S1.** (a) TEM images of *a*-preCaP. (b) DLS measurement of *a*-preCaP. (c) SAED analysis of *a*-preCaP.

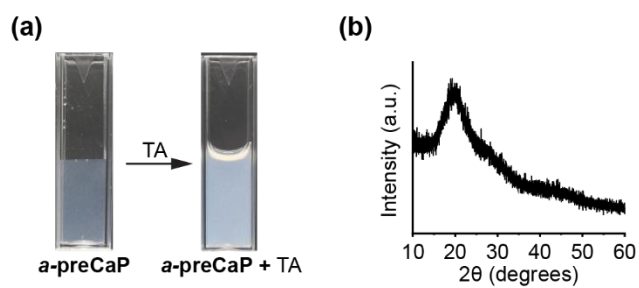

**Figure S2.** (a) Optical images of the aqueous *a*-preCaP solution before and after addition of TA. (b) XRD pattern of PS@CaP.

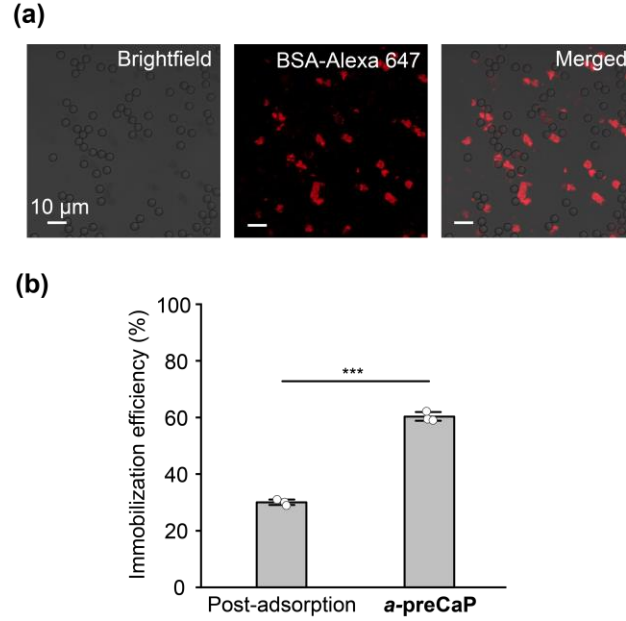

**Figure S3.** (a) CLSM images of homogenous *a*-preCaP precipitation with a high concentration of BSA-Alexa 647 (10  $\mu\text{g/mL}$ ). (b) Immobilization efficiency of BSA-Alexa 647 for the *a*-preCaP and post-adsorption protocols. Data are represented as mean  $\pm$  SD (unpaired, two-sided Student's *t*-test;  $n = 3$ ; \*\*\* $p < 0.001$ ).

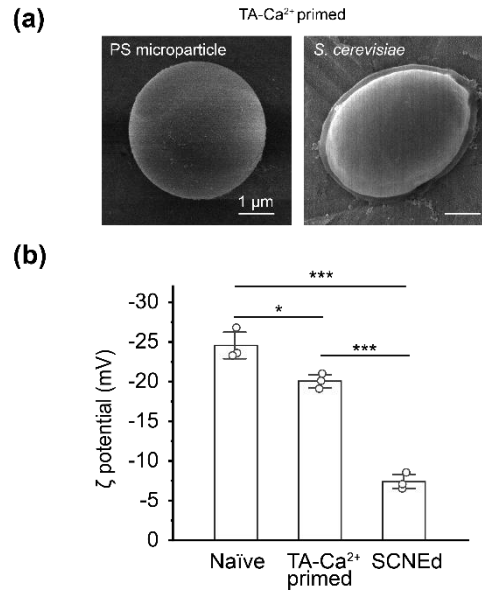

**Figure S4.** (a) FE-SEM images of PS microparticle and *S. cerevisiae* after TA-Ca<sup>2+</sup> priming. (b) Zeta ( $\zeta$ ) potentials of naïve *S. cerevisiae*, TA-Ca<sup>2+</sup>-primed *S. cerevisiae*, and *S.cerevisiae*@CaP. Data are represented as mean  $\pm$  SD (unpaired, two-sided Student's *t*-test;  $n = 3$ ; \*\*\* $p < 0.001$ , \* $p < 0.05$ ).

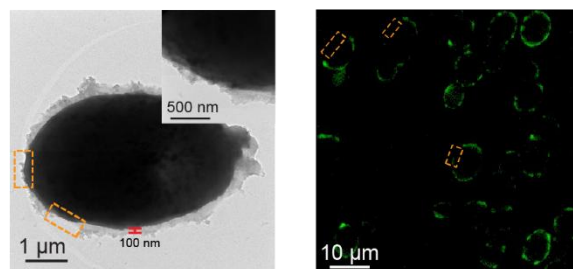

**Figure S5.** TEM and CLSM images of *S.cerevisiae*@CaP formed by the conventional titration protocol, showing CaP-defect sites (orange boxes).

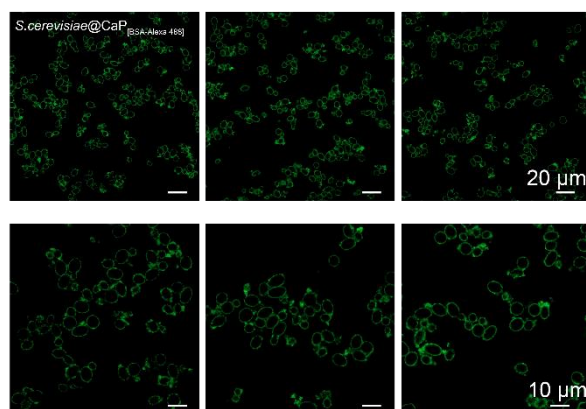

**Figure S6.** CLSM images of *S.cerevisiae*@CaP<sub>[BSA-Alexa 488]</sub> from 3 independent experiments.

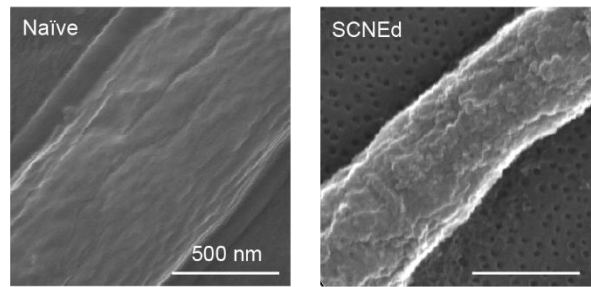

**Figure S7.** FE-SEM images of naïve and SCNEd *L. acidophilus*.

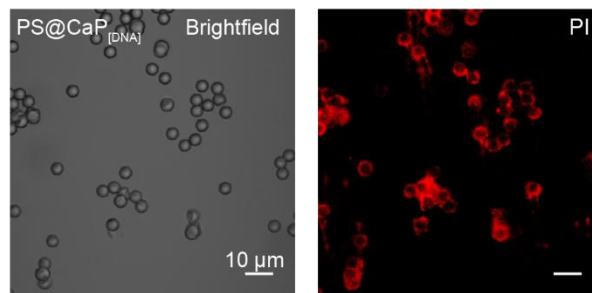

**Figure S8.** CLSM images of PI-stained PS@CaP<sub>[DNA]</sub>.



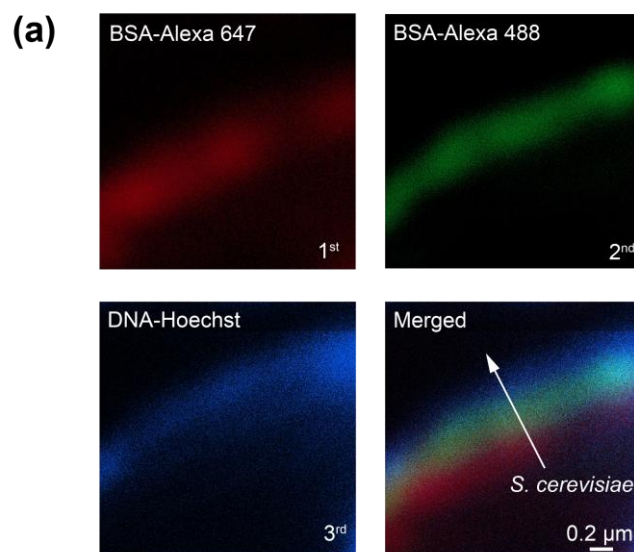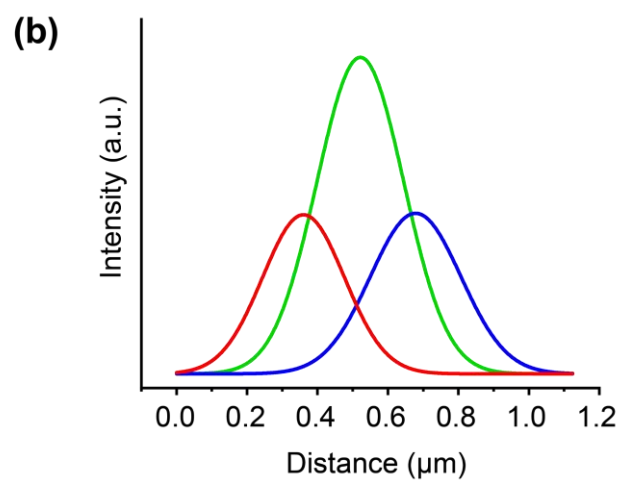

**Figure S9.** (a) CLSM images and (b) line profiles of *S.cerevisiae*@CaP<sub>[BSA-Alexa 647]/[BSA-Alexa 488]/[DNA-Hoechst]</sub>.

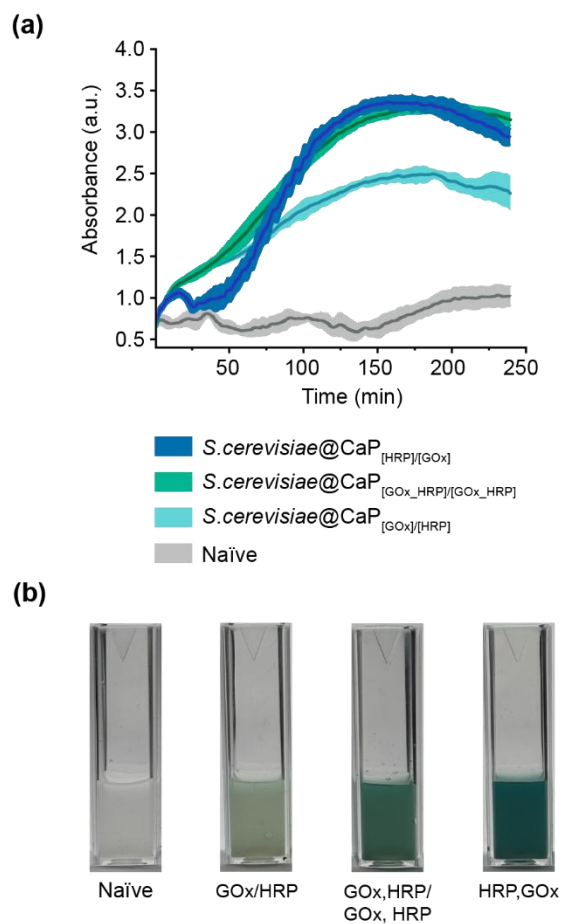

**Figure S10.** (a) Time-lapsed  $ABTS^{++}$  absorbance during cascade reactions of GOx/HRP-embedded *S.cerevisiae*@CaP. (b) Optical images of ABTS assay reaction mixtures after 4 h.

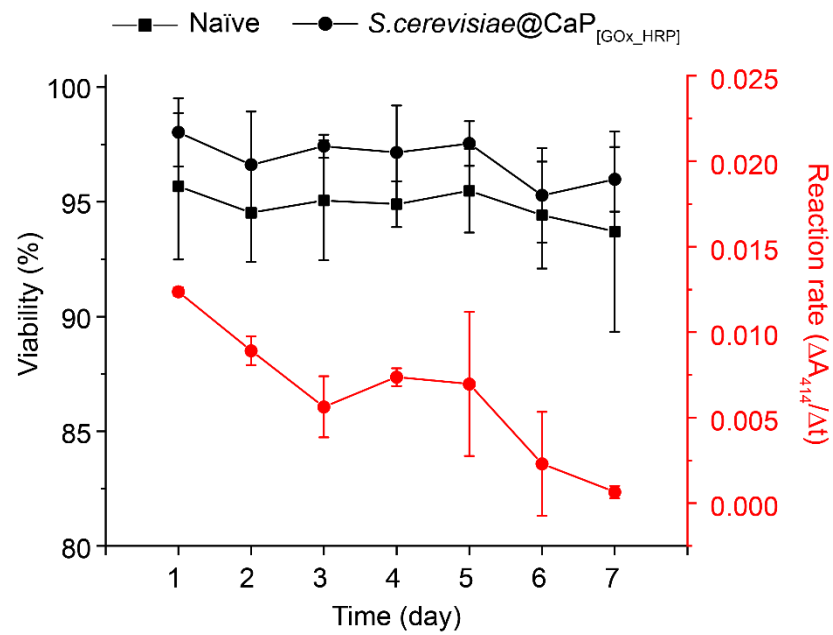

**Figure S11.** (black) Long-term viability of naïve and *S.cerevisiae*@CaP<sub>[GOx\_HRP]</sub> cells and (red) reaction rates for *S.cerevisiae*@CaP<sub>[GOx\_HRP]</sub> during storage at 4 °C.
